# Supplementary material
Source: PubMed Central journal article supplement (PMC4889381)
Supplement: pnas.1600674113.sd02.pdf [file pnas.1600674113.sd02.pdf]

**Supplementary Information dataset 2. Mammalian MH-I and MH-I like, and their characteristics.**

a) Similarity scores between the orthologs of MR1 and different CD1 genes from different species.

|                 | CD1b | CD1c | CD1d | CD1e | MR1        |
|-----------------|------|------|------|------|------------|
| Human/bovine    | 75%  | -    | 55%  | 62%  | <b>83%</b> |
| Human/elephant  | -    | 67%  | 62%  | 71%  | <b>88%</b> |
| Human/marsupial |      | 40%  |      |      | <b>70%</b> |

b) Similarity scores between MH-Ia sequences of human and mouse, and between human and mouse MR1.

|           | HLA-A | HLA-B | HLA-C | human MR1  |
|-----------|-------|-------|-------|------------|
| mouse H2K | 74%   | 72%   | 72%   |            |
| mouse MR1 |       |       |       | <b>86%</b> |

c) MH-I related genes in selected mammalian species.

|                                          | Human                                         | Mouse                                                                                                                                       | Cat | Dog              | Rabbit | Armadillo | Sloth |
|------------------------------------------|-----------------------------------------------|---------------------------------------------------------------------------------------------------------------------------------------------|-----|------------------|--------|-----------|-------|
| <b>MH class Ib "old" MHC</b>             |                                               |                                                                                                                                             |     |                  |        |           |       |
| zag/azgp <sup>(1)</sup>                  | 1                                             | 1                                                                                                                                           | 1   | 1                | 1      | 1         | 1     |
| FcRN                                     | 1                                             | 1                                                                                                                                           | 1   | 1                | 1      | 1         | ?     |
| rae1                                     | 1                                             | 1                                                                                                                                           | 1   | 1+1              | 1+1    | 2         | 1+1   |
| mr1                                      | 1                                             | 1                                                                                                                                           | 1   | -                | -      | -         | -     |
| EPCR/PROCR                               | 1                                             | 1                                                                                                                                           | 1   | 1                | 1      | 1         | 1     |
| CD1a-e                                   | 5                                             | CD1d (1 or 2)                                                                                                                               | 6   | 10               | 8      | 1         | 1     |
| HFE <sub>(2)</sub>                       | 1                                             | 1                                                                                                                                           | 1   | 1 <sub>(3)</sub> | 1      | 1         | 2     |
| MHX                                      | -                                             | -                                                                                                                                           | 1   | ?{               | 1      | 1         | 1/2   |
| <b>MH class Ia and "recent" class Ib</b> |                                               |                                                                                                                                             |     |                  |        |           |       |
|                                          | HLA-A HLA-B<br>HLA-C<br>HLA-E<br>HLA-F, HLA-G | H2-K H2-D<br>H2-L<br>Qa1<br>H2T10, H2M1,<br>H2M2,<br>H2M3,<br>H2M101,<br>H2M102,<br>H2M103,<br>H2M104,<br>H2M105,<br>H2M106,<br>Q10, QA2/Q6 | 9   | 6                | 8      | 61(49)    | 2     |

(1) filtered dataset, all partial sequences removed

(2) note that several species like cow, elephant etc have both mr1 and MHX

(3) no MHX sequence was found in the current dog genome; however, this gene is present in most Caniformes as it is found in ferret, panda, black bear and weddelseal.

d) Distribution of sequence variability within MHX and MHI sequences in rabbit.

| MH-I                   |                 |                           | MH-X                   |                 |                           |
|------------------------|-----------------|---------------------------|------------------------|-----------------|---------------------------|
| Region of the sequence | % of similarity | Proportion <sup>(1)</sup> | Region of the sequence | % of similarity | Proportion <sup>(1)</sup> |
| α1-α2 domains          | 98-100          | 15.9                      | α1-α2 domains          | 98-100          | 94.63                     |
|                        | 96-98           | 15.7                      |                        | 96-98           | 3.38                      |
|                        | 94-96           | 22.6                      |                        | 94-96           | 1.10                      |
|                        | 92-94           | 38.7                      |                        | 92-94           | 0.65                      |
|                        | 90-92           | 7.2                       |                        | 90-92           | 0.24                      |
| rest of the protein    | 98-100          | 44.2                      | rest of the protein    | 98-100          | 92.19                     |
|                        | 96-98           | 31.5                      |                        | 96-98           | 5.47                      |
|                        | 94-96           | 10.6                      |                        | 94-96           | 1.39                      |
|                        | 92-94           | 11.2                      |                        | 92-94           | 0.8                       |
|                        | 90-92           | 2.6                       |                        | 90-92           | 0.15                      |

<sup>(1)</sup> Sequences 90% similar or more to the reference were selected and the proportion falling into the 5 defined categories (90-92; 92-94; 94-96; 96-98; 98-100) reported.

e) Matrix of similarity scores between mammalian MH-X and MH-X like sequences

|           | rabbit | armadillo | cat | panda | microbat | elephant | cow | platypus |
|-----------|--------|-----------|-----|-------|----------|----------|-----|----------|
| rabbit    | 100    |           |     |       |          |          |     |          |
| armadillo | 87     | 100       |     |       |          |          |     |          |
| cat       | 81     | 80        | 100 |       |          |          |     |          |
| panda     | 82     | 83        | 84  | 100   |          |          |     |          |
| microbat  | 82     | 84        | 80  | 82    | 100      |          |     |          |
| elephant  | 81     | 81        | 80  | 80    | 81       | 100      |     |          |
| cow       | 71     | 74        | 67  | 74    | 71       | 69       | 100 |          |
| platypus  | 55     | 56        | 53  | 54    | 55       | 56       | 51  | 100      |
